# Supplementary material
Source: publisher figshare collection journal article supplement (https://tandf.figshare.com/articles/dataset/_/3384892)
Supplement: Supplementary file 2 [file 2]

### Supplement 1: Supplement LOWESS plots

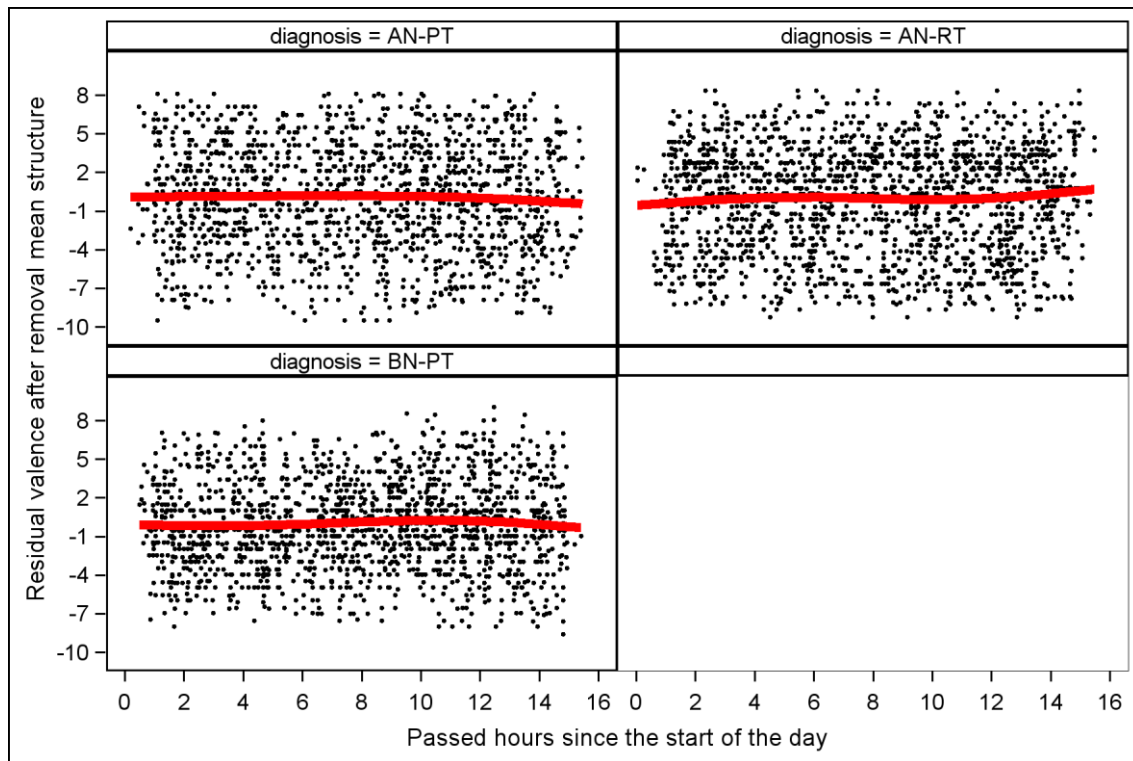

*Figure S1.* LOWESS plot with passed hours since the start of the day versus residuals of valence after removal of the mean structure (AN-PT=Anorexia Nervosa-Binge Purging Type; AN-RT=Anorexia Nervosa-Restrictive Type; BN-PT=Bulimia Nervosa-Binge Purging Type)

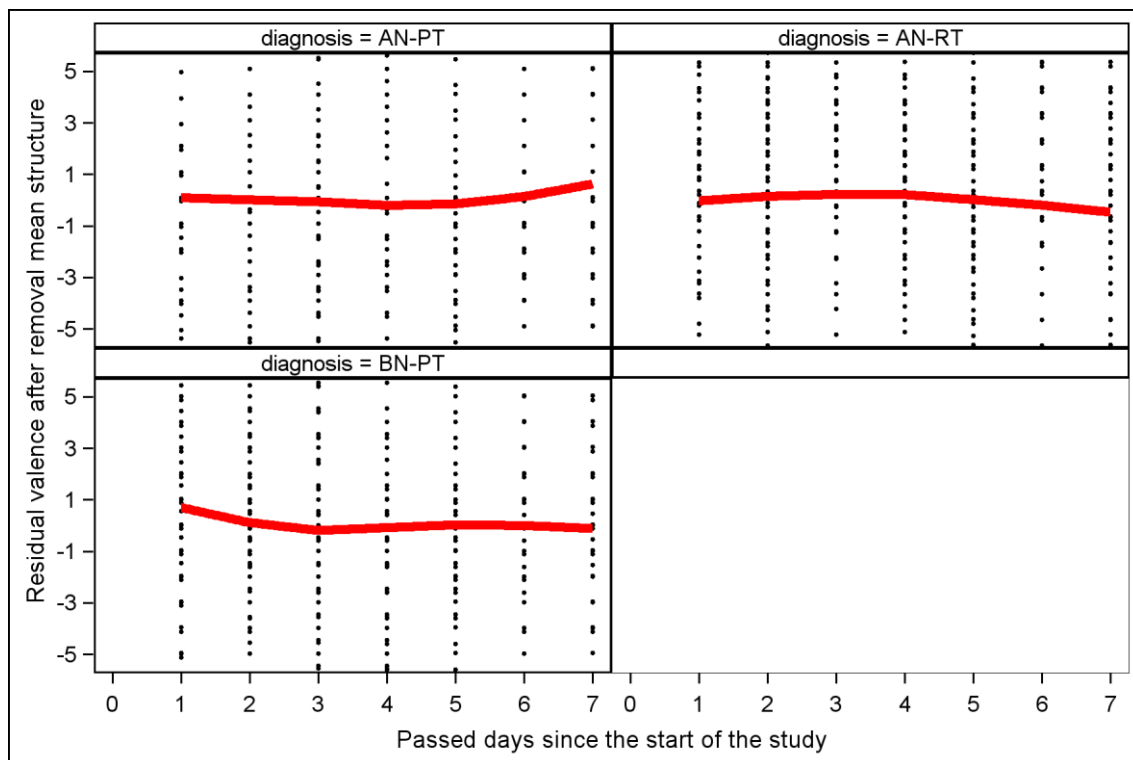

*Figure S2.* LOWESS plot with passed days since the start of the study versus residuals of valence after removal of the mean structure (AN-PT=Anorexia Nervosa-Binge Purging Type; AN-RT=Anorexia Nervosa-Restrictive Type; BN-PT=Bulimia Nervosa-Binge Purging Type)
